# Supplementary material for: Highly Nonrandom Features of Synaptic Connectivity in Local Cortical Circuits
Source: PLOS journal article supplement (doi:10.1371/journal.pbio.0030068), 2005-02-22
Supplement: S5 (10.1371/journal.pbio.0030068.s005) [file journal.pbio.0030068.s005]

**
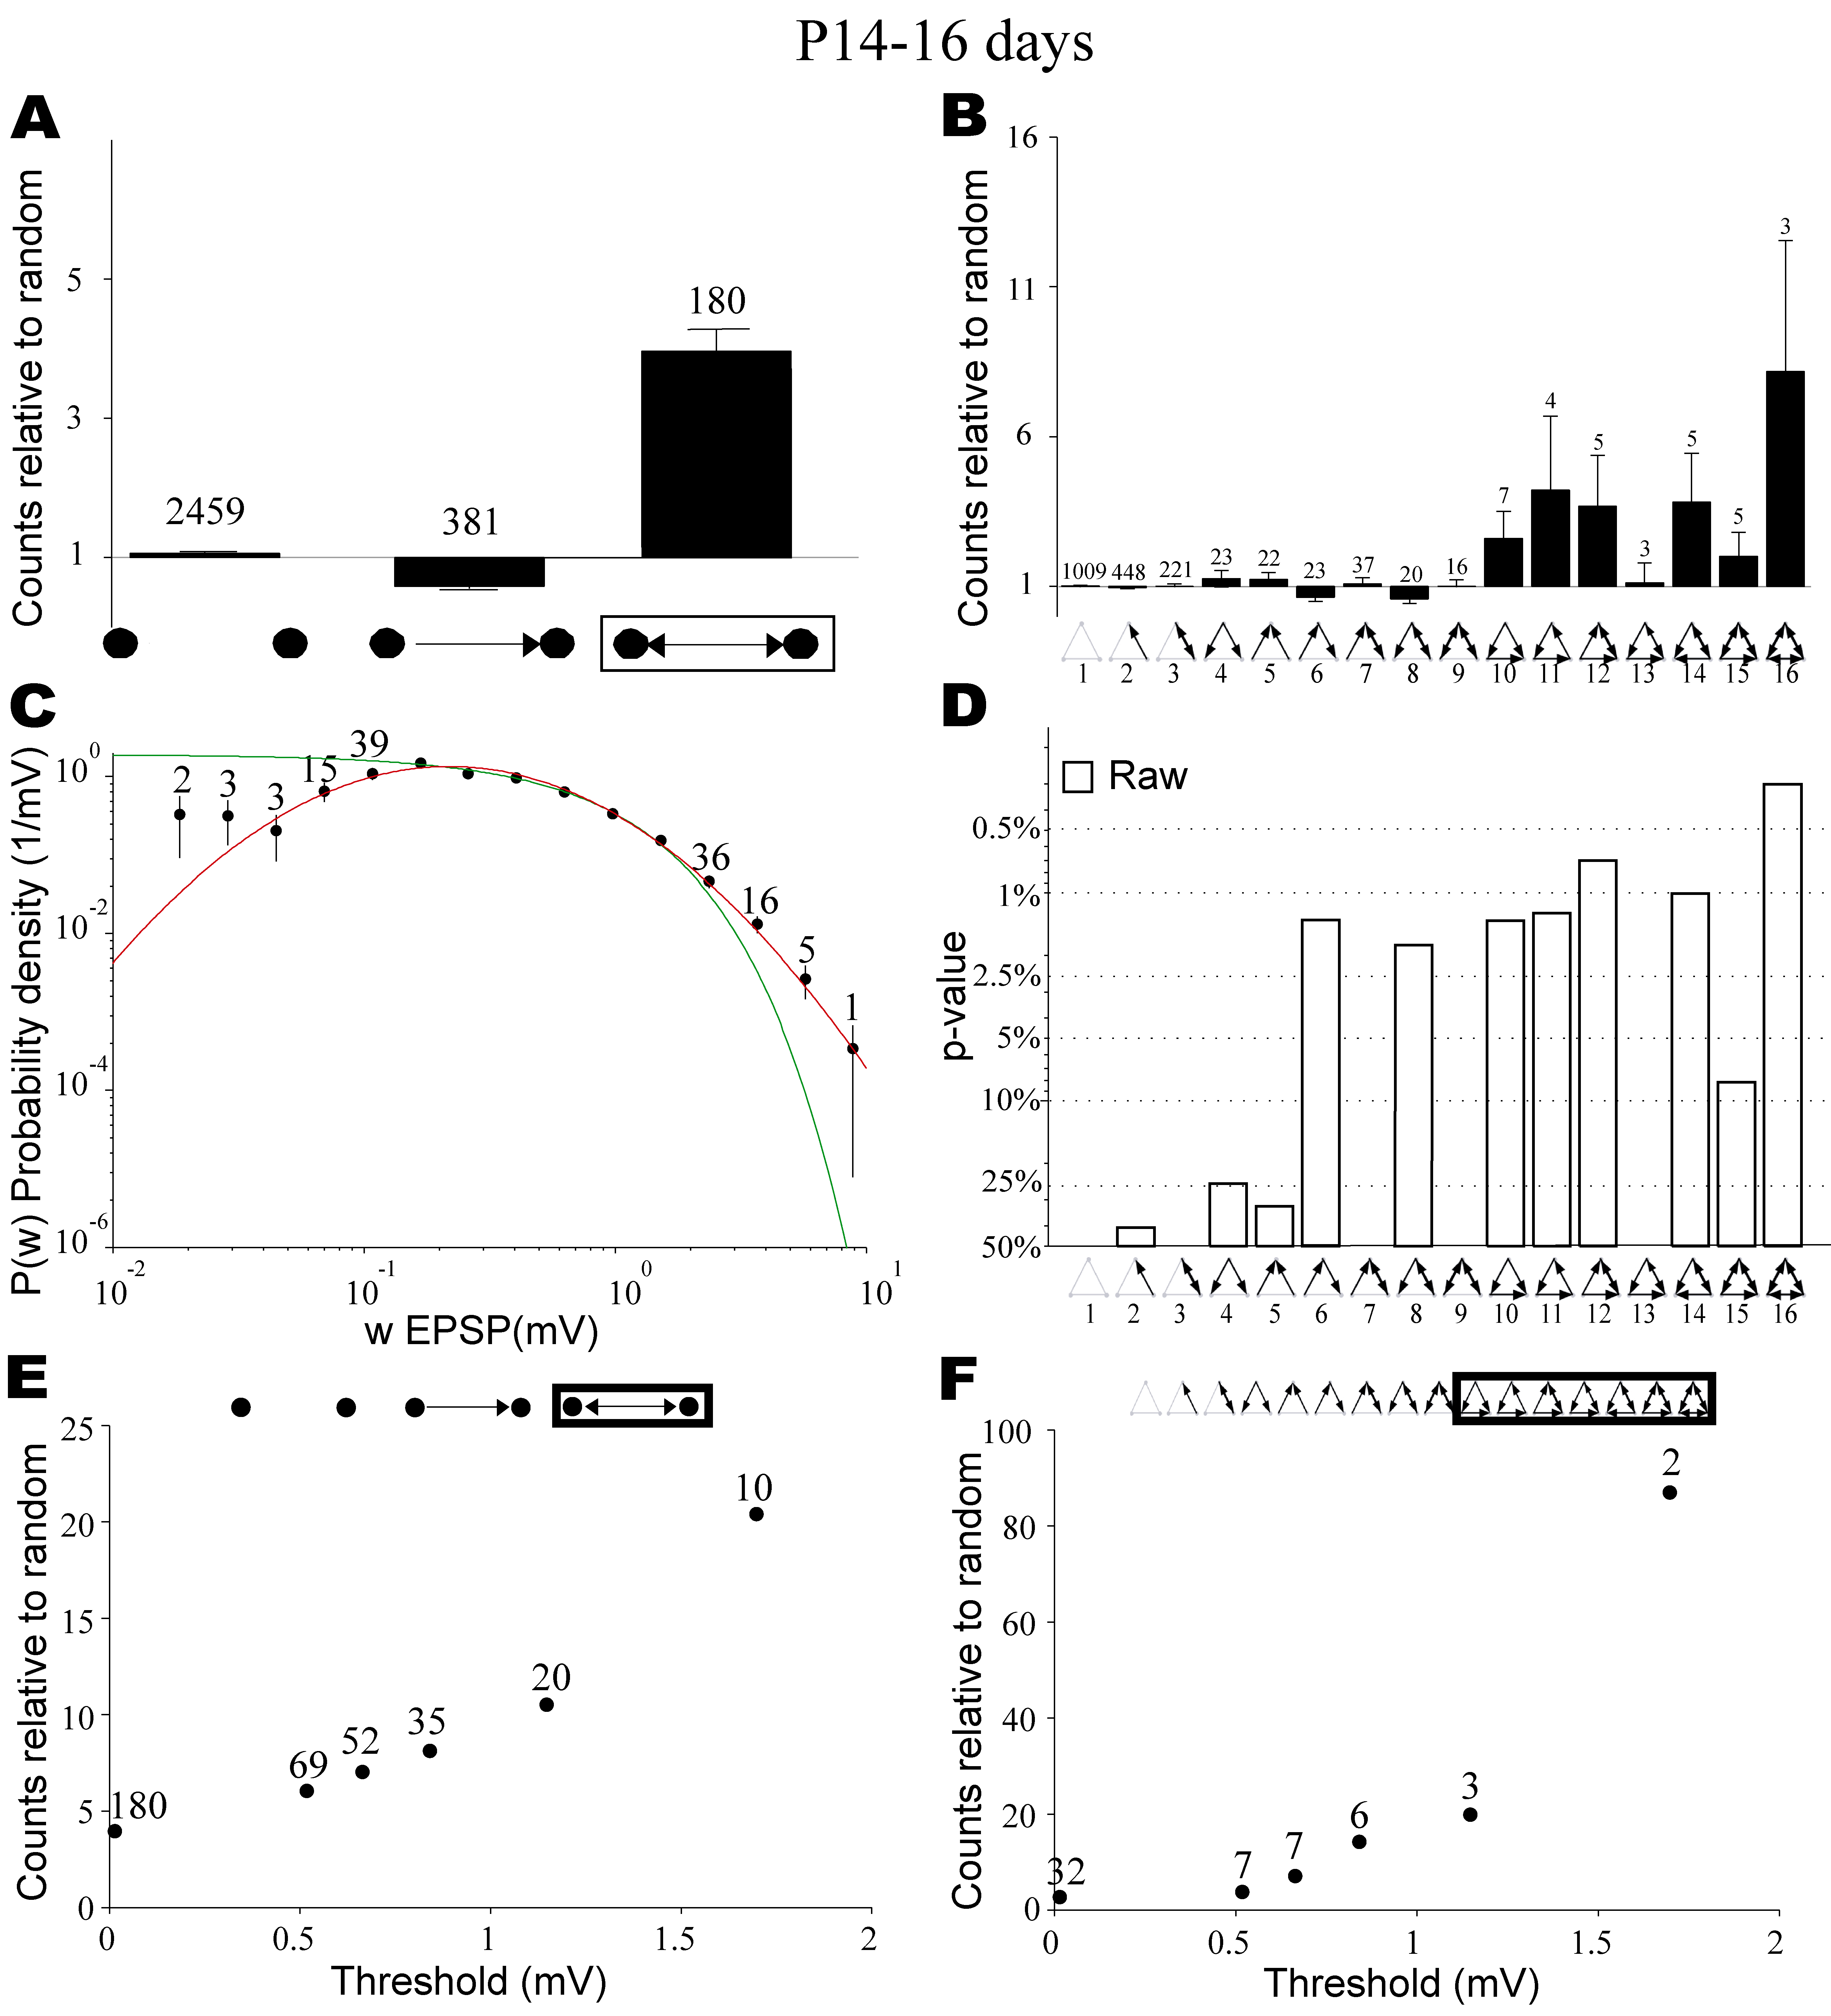
**

**Figure S5**: Main results of this paper are still valid for the subset of data from P14-16 days animals

(**A**,**B)** Overrepresentation of bidirectional connections and highly connected triplets. Numbers on top of bars are actual counts.

(**C)** Synaptic connection strengths are well fit by the lognormal distribution**.** Number on top of dots are actual counts (not shown when >50).

(**D)** Probability of significant deviation from random for a given triplet motif.

(**E,F)** Increase in overrepresentation of bidirectional connections and highly connected triplets for increasingly higher connection strength thresholds.
