# Supplementary material for: Highly Nonrandom Features of Synaptic Connectivity in Local Cortical Circuits
Source: PLOS journal article supplement (doi:10.1371/journal.pbio.0030068), 2005-02-22
Supplement: S6 (10.1371/journal.pbio.0030068.s006) [file journal.pbio.0030068.s006]

## Figure S6. Quadruplet catalogue
